# Supplementary material for: The Language That Drives Engagement: A Systematic Large-scale Analysis of Headline Experiments
Source: Atypon-hosted journal article supplement (doi:10.1287/mksc.2021.0018), 2024-11-04
Supplement: mksc.2021.0018.sm1.pdf [file mksc.2021.0018.sm1.pdf]

## Appendix Supplemental Statistical Materials

**Table W1: Topics predictions for click-through rate, for each of the models**

|                    | Full Model             | LASSO                  | Holm-Bonferroni        |
|--------------------|------------------------|------------------------|------------------------|
| physical health    | -.0001221***(.0000443) | -.0001263***(.0000443) | -.0001153***(.0000439) |
| mental health      | -.0000535(.0000335)    | -.0000493(.0000335)    | -.0000479(.0000335)    |
| drugs              | 3.800e-06(.0000327)    | 2.000e-07(.0000328)    | 3.000e-06(.0000328)    |
| financial          | -.0002679***(.0000533) | -.0002794***(.0000533) | -.0003208***(.0000514) |
| sex                | .0001407***(.0000436)  | .0001431***(.0000436)  | .0001352***(.0000434)  |
| religion           | 9.900e-06(.0000409)    | .0000164(.0000409)     | -3.100e-06(.0000409)   |
| famous             | .0000551*(.0000316)    | .0000527*(.0000317)    | .000055*(.0000317)     |
| government & crime | -.0000914***(.0000352) | -.0001032***(.000035)  | -.0001249***(.000034)  |
| business           | .0000284(.0000352)     | .0000303(.0000351)     | .0000291(.000035)      |
| education          | .0000863***(.0000334)  | .0000857***(.0000335)  | .0001043***(.0000334)  |
| entertainment      | .0001109***(.0000355)  | .0001121***(.0000355)  | .0001169***(.0000354)  |
| news               | .0000362(.0000313)     | .0000346(.0000313)     | .000042(.0000313)      |
| identity           | .0001877***(.0000338)  | .0001768***(.0000338)  | .0001836***(.0000337)  |
| hobby              | -.0000416(.000034)     | -.0000398(.0000339)    | -.000046(.0000337)     |
| technology         | -.0001386***(.0000364) | -.0001427***(.0000364) | -.0001366***(.0000364) |
| impressions        | 2.000e-07(4.000e-07)   | 2.000e-07(4.000e-07)   | 2.000e-07(4.000e-07)   |

Standard errors are in parentheses: \*\*\* p<.01, \*\* p<.05, \* p<.1

**Table W2: Lasso-selected Construct by Construct interactions**

|                                     | Coef.         | St.Err.   | t-value | p-value              | [95% Conf     | Interval]  | Sig |
|-------------------------------------|---------------|-----------|---------|----------------------|---------------|------------|-----|
| impressions                         | 2.000e-07     | 4.000e-07 | 0.53    | .591655              | -5.000e-07    | 9.000e-07  |     |
| Reading Ease                        | -.0004014     | .0000431  | -9.30   | .0000000             | -.0004859     | -.0003168  | *** |
| Women                               | .0004436      | .0000383  | 11.60   | .0000000             | .0003686      | .0005186   | *** |
| Common Words                        | .0002843      | .0000447  | 6.36    | .0000000             | .0001967      | .0003719   | *** |
| Social Plural Family                | -.0001994     | .0000423  | -4.72   | 2.400e-06            | -.0002823     | -.0001165  | *** |
| Visual Language                     | .0002885      | .0000372  | 7.75    | .0000000             | .0002155      | .0003614   | *** |
| Intensity of Emotion                | .0001907      | .0000561  | 3.40    | .0006816             | .0000807      | .0003008   | *** |
| Verb Categories                     | -.0001622     | .0000513  | -3.16   | .0015527             | -.0002627     | -.0000618  | *** |
| Concrete                            | -.0000141     | .0000439  | -0.32   | .747569              | -.0001001     | .0000719   |     |
| Compare Contrast                    | -.000217      | .0000482  | -4.50   | 6.900e-06            | -.0003116     | -.0001224  | *** |
| Secret                              | .0001374      | .0000282  | 4.88    | 1.100e-06            | .0000822      | .0001926   | *** |
| Men                                 | .0003031      | .0000354  | 8.56    | .0000000             | .0002337      | .0003725   | *** |
| Positive Tone                       | -.0001422     | .0000358  | -3.98   | .0000701             | -.0002122     | -.0000721  | *** |
| Conflict                            | .0000774      | .0000452  | 1.71    | .0868781             | -.0000112     | .000166    | *   |
| Past                                | .0003377      | .0000317  | 10.65   | .0000000             | .0002755      | .0003998   | *** |
| Harm                                | .0000741      | .000051   | 1.45    | .146399              | -.0000259     | .0001742   |     |
| Positive Emotion                    | -.0000507     | .0000482  | -1.05   | .2926948             | -.0001453     | .0000438   |     |
| Location                            | -.000323      | .0000387  | -8.35   | .0000000             | -.0003988     | -.0002472  | *** |
| Present                             | 7.900e-06     | .0000327  | 0.24    | .8097339             | -.0000562     | .0000719   |     |
| Questions                           | -.0002958     | .00004    | -7.39   | .0000000             | -.0003742     | -.0002173  | *** |
| Time Related                        | .0001296      | .0000277  | 4.69    | 2.800e-06            | .0000754      | .0001838   | *** |
| Aesthetics                          | .0000886      | .0000275  | 3.23    | .0012475             | .0000348      | .0001425   | *** |
| Safekeeping                         | -.0001381     | .0000369  | -3.74   | .0001831             | -.0002104     | -.0000657  | *** |
| Negative Emotion                    | .0000735      | .0000446  | 1.65    | .0995142             | -.0000014     | .0001609   | *   |
| Disgusting                          | .0001488      | .0000399  | 3.73    | .0001954             | .0000705      | .0002271   | *** |
| Angry                               | .0001117      | .0000471  | 2.37    | .0177333             | .0000194      | .000204    | **  |
| First Person                        | .0000425      | .000049   | 0.87    | .3853437             | -.0000535     | .0001386   |     |
| Second Person                       | .0000522      | .0000335  | 1.56    | .1184474             | -.0000133     | .0001178   |     |
| Fairness                            | -.0000734     | .0000412  | -1.78   | .0752695             | -.0001542     | 7.500e-06  | *   |
| Morality                            | -.0000489     | .0000379  | -1.29   | .197032              | -.0001231     | .0000254   |     |
| Threat                              | -.0000573     | .0000416  | -1.38   | .168904              | -.0001389     | .0000243   |     |
| Authority                           | -.0002163     | .0000629  | -3.44   | .0005908             | -.0003397     | -.0000929  | *** |
| Cuteness                            | .0000478      | .0000293  | 1.63    | .1022911             | -9.500e-06    | .0001052   |     |
| Negative Tone                       | .0000546      | .0000416  | 1.31    | .1897833             | -.000027      | .0001362   |     |
| Reading Ease X Reading Ease         | -.0001244     | .0000385  | -3.23   | .0012247             | -.0001998     | -.000049   | *** |
| Reading Ease X Women                | -.0000587     | .0000405  | -1.45   | .146575              | -.0001381     | .0000206   |     |
| Common Words X Social Pl. Family    | .0000273      | .000043   | 0.64    | .520378              | -.0000569     | .0001115   |     |
| Common Words X Visual Language      | .0000633      | .0000412  | 1.54    | .1244381             | -.0000174     | .000144    |     |
| Common Words X Intensity of Emotion | -.0000871     | .0000444  | -1.96   | .0497503             | -.0001742     | -1.000e-07 | **  |
| Common Words X Verb Categories      | -.00004       | .0000454  | -0.88   | .3788044             | -.000129      | .000049    |     |
| Concrete X Conflict                 | .0000823      | .0000503  | 1.64    | .1017704             | -.0000163     | .000181    |     |
| Concrete X Angry                    | .000189       | .0000557  | 3.39    | .0006992             | .0000797      | .0002982   | *** |
| Concrete X Verb Categories          | -.0001062     | .0000464  | -2.29   | .0220287             | -.0001972     | -.0000153  | **  |
| Compare Contrast X Men              | -.0000977     | .0000469  | -2.08   | .0372414             | -.0001896     | -5.800e-06 | **  |
| Conflict X Past                     | -.0000256     | .000041   | -0.62   | .5326936             | -.000106      | .0000548   |     |
| Conflict X Harm                     | -.0000934     | .0000326  | -2.86   | .0041898             | -.0001573     | -.0000295  | *** |
| Conflict X Positive Emotion         | .000104       | .0000684  | 1.52    | .1287381             | -.0000302     | .0002381   |     |
| Location X Past                     | -.00002       | .0000323  | -0.62   | .5358865             | -.0000833     | .0000433   |     |
| Present X Questions                 | .0000812      | .0000327  | 2.49    | .0129123             | .0000172      | .0001452   | **  |
| Questions X Women                   | .0000266      | .0000406  | 0.65    | .5126889             | -.000053      | .0001061   |     |
| Secret X Safekeeping                | 7.300e-06     | .0000362  | 0.20    | .8392326             | -.0000636     | .0000783   |     |
| Secret X Disgusting                 | .0000509      | .000028   | 1.82    | .0689168             | -3.900e-06    | .0001057   | *   |
| Secret X Angry                      | -.0000771     | .000043   | -1.79   | .0732172             | -.0001614     | 7.200e-06  | *   |
| First Person X Second Person        | .000052       | .0000617  | 0.84    | .3989404             | -.0000689     | .0001729   |     |
| First Person X Fairness             | .0000988      | .0000606  | 1.63    | .1026462             | -.0000199     | .0002175   |     |
| Women X Men                         | .0001567      | .0000345  | 4.54    | 5.700e-06            | .000089       | .0002244   | *** |
| Women X Verb Categories             | -.0000582     | .0000384  | -1.52   | .129751              | -.0001334     | .0000171   |     |
| Men X Verb Categories               | -.000137      | .000037   | -3.70   | .0002163             | -.0002095     | -.0000644  | *** |
| Authority X Cuteness                | -.0000541     | .0000538  | -1.01   | .3148083             | -.0001595     | .0000513   |     |
| Threat X Aesthetics                 | .0000809      | .0000408  | 1.98    | .0473074             | 1.000e-06     | .0001609   | **  |
| Harm X Negative Tone                | -.0001316     | .0000287  | -4.59   | 4.400e-06            | -.0001879     | -.0000754  | *** |
| Cuteness X Negative Tone            | .0000692      | .000027   | 2.56    | .0104904             | .0000162      | .0001222   | **  |
| Mean dependent var                  | 0.01107       |           |         | SD dependent var     | 0.00849       |            |     |
| R-squared                           | 0.05021       |           |         | Number of obs        | 33677         |            |     |
| F-test                              | 17.71398      |           |         | Prob > F             | 0.00000       |            |     |
| Akaike crit. (AIC)                  | -288804.25684 |           |         | Bayesian crit. (BIC) | -288147.14035 |            |     |

\*\*\* p<.01, \*\* p<.05, \* p<.1

**Table W3: Lasso-selected Construct by Topic interactions**

|                                  | Coef.      | St.Err.       | t-value | p-value              | [95% Conf  | Interval      | Sig |
|----------------------------------|------------|---------------|---------|----------------------|------------|---------------|-----|
| impressions                      | 2.000e-07  | 4.000e-07     | 0.55    | .5808555             | -5.000e-07 | 9.000e-07     |     |
| Goals                            | -.000197   | .000036       | -5.48   | 0                    | -.0002674  | -.0001265     | *** |
| Financial                        | -.0003352  | .0000597      | -5.61   | 0                    | -.0004523  | -.0002181     | *** |
| Government & Crime               | -.0001728  | .0000357      | -4.84   | 1.300e-06            | -.0002429  | -.0001028     | *** |
| Visual Language                  | .0001763   | .0000349      | 5.05    | 4.000e-07            | .0001079   | .0002447      | *** |
| Business                         | .0000921   | .0000341      | 2.70    | .0068824             | .0000253   | .0001589      | *** |
| News                             | .0000263   | .0000331      | 0.80    | .4264933             | -.0000385  | .0000911      |     |
| Auditory Language                | .000083    | .0000327      | 2.54    | .011492              | .0000189   | .0001472      | **  |
| Religion                         | -.0000107  | .0000433      | -0.25   | .804797              | -.0000956  | .0000742      |     |
| Identity                         | .0001915   | .0000349      | 5.50    | 0                    | .0001232   | .0002598      | *** |
| Cuteness                         | .0000574   | .0000296      | 1.94    | .0523999             | -6.000e-07 | .0001153      | *   |
| Sex                              | .0001201   | .0000444      | 2.71    | .0068327             | .0000331   | .0002071      | *** |
| Famous                           | .0000354   | .0000337      | 1.05    | .29348               | -.0000307  | .0001016      |     |
| Positive Tone                    | -.0001729  | .0000345      | -5.01   | 6.000e-07            | -.0002406  | -.0001052     | *** |
| Intensity of Emotion             | .0002143   | .0000488      | 4.39    | .0000115             | .0001186   | .00031        | *** |
| Drugs                            | 6.800e-06  | .0000355      | 0.19    | .8471417             | -.0000627  | .0000763      |     |
| Positive Emotion                 | -.0000572  | .0000485      | -1.18   | .2378614             | -.0001522  | .0000378      |     |
| Negative Emotion                 | .000046    | .0000418      | 1.10    | .2706174             | -.0000358  | .0001279      |     |
| Entertainment                    | .0000212   | .0000325      | 0.65    | .5138199             | -.0000425  | .000085       |     |
| Disgusting                       | .0001942   | .0000427      | 4.55    | 5.400e-06            | .0001105   | .0002778      | *** |
| Physical Health                  | -.0002004  | .0000449      | -4.46   | 8.100e-06            | -.0002885  | -.0001124     | *** |
| Angry                            | .0001753   | .000047       | 3.73    | .0001911             | .0000832   | .0002673      | *** |
| Education                        | .0001396   | .0000364      | 3.84    | .0001257             | .0000683   | .0002109      | *** |
| Verb Categories                  | .0000176   | .0000382      | 0.46    | .6458357             | -.0000573  | .0000925      |     |
| Conjunction                      | .0000893   | .0000259      | 3.45    | .0005617             | .0000386   | .00014        | *** |
| Goals X Financial                | .0000669   | .0000303      | 2.21    | .027337              | 7.500e-06  | .0001262      | **  |
| Goals X Government & Crime       | .0000972   | .0000318      | 3.06    | .0022159             | .000035    | .0001595      | *** |
| Visual Language X Business       | 7.500e-06  | .0000353      | 0.21    | .8323787             | -.0000616  | .0000766      |     |
| Visual Language X News           | -.0000819  | .0000354      | -2.31   | .0209042             | -.0001513  | -.0000124     | **  |
| Auditory Language X Religion     | -.0000183  | .0000447      | -0.41   | .681551              | -.000106   | .0000693      |     |
| Auditory Language X Identity     | .0000765   | .00003        | 2.55    | .0108385             | .0000177   | .0001354      | **  |
| Cuteness X Sex                   | .0000833   | .0000363      | 2.29    | .0217793             | .0000121   | .0001545      | **  |
| Cuteness X Famous                | -.0000375  | .0000441      | -0.85   | .3947729             | -.0001238  | .0000489      |     |
| Cuteness X News                  | -.0000346  | .0000406      | -0.85   | .3939527             | -.0001142  | .000045       |     |
| Positive Tone X Religion         | -3.900e-06 | .0000353      | -0.11   | .91152               | -.0000732  | .0000653      |     |
| Positive Tone X News             | -.0000227  | .0000342      | -0.67   | .505424              | -.0000897  | .0000442      |     |
| Intensity of Emotion X Drugs     | .0000295   | .0000429      | 0.69    | .4915314             | -.0000546  | .0001136      |     |
| Positive Emotion X Drugs         | -.0000753  | .0000389      | -1.94   | .0529201             | -.0001516  | 9.000e-07     | *   |
| Positive Emotion X Sex           | -.0000261  | .0000588      | -0.44   | .65675               | -.0001413  | .0000891      |     |
| Positive Emotion X Religion      | .0001041   | .0000568      | 1.83    | .06673               | -7.200e-06 | .0002155      | *   |
| Positive Emotion X Identity      | .0001397   | .0000448      | 3.12    | .001799              | .000052    | .0002275      | *** |
| Negative Emotion X Entertainment | -6.600e-06 | .0000417      | -0.16   | .8741928             | -.0000884  | .0000752      |     |
| Disgusting X Physical Health     | -.0000143  | .0000215      | -0.66   | .5064533             | -.0000565  | .0000279      |     |
| Disgusting X Drugs               | -.000028   | .0000295      | -0.95   | .3429713             | -.0000858  | .0000298      |     |
| Angry X Financial                | -2.500e-06 | .000079       | -0.03   | .9743155             | -.0001575  | .0001524      |     |
| Angry X Sex                      | -.00001    | .000068       | -0.15   | .8833318             | -.0001433  | .0001233      |     |
| Angry X Education                | .0002009   | .000061       | 3.29    | .0009923             | .0000813   | .0003205      | *** |
| Angry X News                     | .0000818   | .0000575      | 1.42    | .1550203             | -.0000309  | .0001945      |     |
| Verb Categories X Identity       | 7.800e-06  | .0000376      | 0.21    | .8360679             | -.0000659  | .0000815      |     |
| Conjunction X Religion           | -.000018   | .000033       | -0.54   | .5860857             | -.0000827  | .0000467      |     |
| Constant                         | .0103166   | .0013311      | 7.75    | 0                    | .0077076   | .0129256      | *** |
| Mean dependent var               |            | 0.01107       |         | SD dependent var     |            | 0.00849       |     |
| R-squared                        |            | 0.01479       |         | Number of obs        |            | 33677         |     |
| F-test                           |            | 7.75285       |         | Prob > F             |            | 0.00000       |     |
| Akaike crit. (AIC)               |            | -287625.15920 |         | Bayesian crit. (BIC) |            | -287195.50611 |     |

\*\*\* p<.01, \*\* p<.05, \* p<.1

**Robustness Check Details**

| Robustness Check                | Construct Changes                                                                                                                                                                                                                                                                                                                                                                                                                                                                                                                                                                   |
|---------------------------------|-------------------------------------------------------------------------------------------------------------------------------------------------------------------------------------------------------------------------------------------------------------------------------------------------------------------------------------------------------------------------------------------------------------------------------------------------------------------------------------------------------------------------------------------------------------------------------------|
| Including Excluded Constructs   | Inclusion of these constructs did not significantly change any of the results for the other constructs, excepting for “concrete”, “deliberation”, and “negative emotion”, all of which now had a significant (at p<.05 level, with only “concrete” passing the Holm-Bonferroni correction) and positive impact on click-through rate, and “verb categories” was now not significant.                                                                                                                                                                                                |
| Using all the original features | This analysis revealed eight weakly significant variables (clickbait-related words, tutorial words, insight-related words, negating words, positive emotion words, usage of ‘they’, usage of ‘I’, and usage of articles) that were not part of any of the constructs that were significant in at least one of the models tested (i.e., the full model, Holm-Bonferroni model or the LASSO-selected model). However, only one of these variables (usage of articles) was significant as an individual variable after Holm-Bonferroni correction to account for multiple comparisons. |
| LN(1+X) model                   | Using either approach, the Holm-Bonferroni corrected model using the alternative constructs revealed nearly the same results as in our main Holm-Bonferroni-corrected model, except that “intensity of emotion”, “other senses”, and “action words”, were no longer significant after these corrections.                                                                                                                                                                                                                                                                            |
| Logit Transformed Model         | Using Holm-Bonferroni correction, we see largely similar results as in the original model except that five constructs (“social plural family”, “desires”, “goals”, “cuteness”, and “positive tone”) become significant in the logit-based model.                                                                                                                                                                                                                                                                                                                                    |
